# Supplementary material
Source: ML conference proceedings conference paper supplement (https://openreview.net/forum?id=LTbIUkN95h)
Supplement: supplementary_material [file attachment]

## Supplementary Material

### A Proof of Theorem 1

In this section, we present the proof of Theorem 1. We first introduce and recall some necessary notations and assumptions. Then, we present some auxiliary lemmas and their proofs. Finally, we combine the lemmas to prove the main result.

**Notations:** Define  $P(\nu)$  as distribution over states such that  $(s', x') \sim P(\nu) \Leftrightarrow (s, x, a) \sim \nu, s' \sim P(s'|s, a), x' = g(s, a, s')$ . In other words, it is the distribution of the next state if the state action pair follows  $\nu$ . For  $f : \mathcal{S} \times \mathcal{X} \times \mathcal{A} \rightarrow \mathbb{R}, \nu \in \Delta(\mathcal{S} \times \mathcal{X} \times \mathcal{A})$ , where  $\Delta(\cdot)$  is the probability simplex, and  $p > 1$ , define  $\|f\|_{p, \nu} = (\mathbb{E}_{(s, x, a) \sim \nu} [|f(s, x, a)|^p])^{1/p}$ . Define  $\pi_{f, f'}(s, x) := \arg \min_{a \in \mathcal{A}} \min\{f(s, x, a), f'(s, x, a)\}$ .

Recall that in Alg. 2, at iteration  $k$ ,

$$\mathcal{L}_{\hat{D}_k}(f; f_{k-1}) = \frac{1}{|\hat{D}_k|} \sum_{(s, x, a, r, s', x') \in \hat{D}_k} (f(s, x, a) - r - \gamma V_{f_{k-1}}(s', x'))^2,$$

where

$$f_k := \arg \min_{f \in \mathcal{F}} \mathcal{L}_{\hat{D}_k}(f; f_{k-1}) \quad \text{and} \quad V_{f_k}(s, x) := \min_{a \in \mathcal{A}} f_k(s, x, a).$$

#### Assumptions:

**Assumption A.1.** (Realizability) For the optimal policy,  $Q^* \in \mathcal{F}$ .

**Assumption A.2.** (Completeness) For the policy  $\pi$  to be evaluated,  $\forall f \in \mathcal{F}, \mathcal{T}f \in \mathcal{F}$ , where  $\mathcal{T} : \mathbb{R}^{\mathcal{S} \times \mathcal{X} \times \mathcal{A}} \rightarrow \mathbb{R}^{\mathcal{S} \times \mathcal{X} \times \mathcal{A}}$  is the Bellman update operator,  $\forall f :$

$$(\mathcal{T}f)(s, x, a) := R(s, x, a) + \gamma \mathbb{E}_{s' \sim P(\cdot|s, a)} [V_f(s', x' = g(s, x, a, s'))].$$

We say a distribution  $\nu \in \Delta(\mathcal{S} \times \mathcal{A})$  is admissible in MDP  $(\mathcal{S}, \mathcal{X}, \mathcal{A}, P, R, \gamma)$ , if there exist  $h \geq 0$  and a policy  $\pi$  such that  $\nu(s, a) = \sum_{x \in \mathcal{X}} \Pr(s_h = s, x_h = x, a_h = a | s_0, x_0, \pi)$ . The following assumption is imposed to limit the distribution shift. Note that “admissible” is defined on the stochastic state and action. Later, we will also abuse the notation and call  $\nu \in \Delta(\mathcal{S} \times \mathcal{X} \times \mathcal{A})$  is admissible if  $\nu(s, a) = \sum_x \nu(s, x, a)$  is admissible.

**Assumption A.3.** For a data distribution  $\mu$ , we assume that there exists  $C < \infty$  such that for any admissible  $\nu$  and any  $(s, a) \in \mathcal{S} \times \mathcal{A}$ ,

$$\frac{\nu(s, a)}{\mu(s, a)} \leq C,$$

where  $\nu(s, a) = \sum_{x \in \mathcal{X}} \nu(s, x, a)$  and  $\mu(s, a) = \sum_{x \in \mathcal{X}} \mu(s, x, a)$ .

Assumptions A.2-A.3 are standard assumptions in batch reinforcement learning (Chen and Jiang, 2019). However, in assumption A.3, we only require the data coverage of stochastic states which is the fundamental difference.

**Assumption A.4.** We assume that there exists a set  $\mathcal{B}$  of typical pseudo-stochastic states such that the distributions  $\beta_k(x), k = 1, \dots, K$  used for augmenting virtual samples satisfy  $\beta_k(x) \geq \sigma_1, \forall x \in \mathcal{B}$ . We also assume that the marginal distribution over using a reasonable policy  $\pi$ , that is,  $d_{\eta_0}^\pi(s, x) := (1 - \gamma) \sum_{t=0}^{\infty} \gamma^{t-1} \Pr(s_t = s, x_t = x | (s_0, x_0) \sim \eta_0, \pi)$  satisfies  $\sum_{s \in \mathcal{S}} \sum_{x \in \mathcal{X}, x \notin \mathcal{B}} d_{\eta_0}^\pi(s, x) \leq \sigma_2$ , where  $\eta_0$  is the initial distribution. Furthermore, if we have for a distribution  $\eta$  of the states satisfying  $\sum_{s \in \mathcal{S}} \sum_{x \in \mathcal{X}, x \notin \mathcal{B}} \eta(s, x) \leq \sigma_2$ , then under any reasonable policy  $\pi$ , the marginal distribution  $\eta_h^\pi(s, x) := \Pr(s_h = s, x_h = x | (s_0, x_0) \sim \eta, \pi)$  satisfies  $\sum_{s \in \mathcal{S}} \sum_{x \in \mathcal{X}, x \notin \mathcal{B}} \eta_h^\pi(s, x) \leq c_0 \sigma_2, \forall h > 0$ , for some constant  $c_0 \geq 1$ . In particular, all the policies at each iteration, the optimal policy and their joint policies are assumed to be reasonable policies.

We remark that in a queuing network, under any stable policy, the queue distribution has an exponential tail; in other words, large queue lengths occur with a small probability. In such a case, we can use a uniform distribution for pseudo-stochastic states in set  $\mathcal{B}$  to guarantee that  $\sigma_1 = \Theta\left(\frac{1}{\log(1/\sigma_2)}\right)$ .

Therefore, if we choose  $\sigma_2 = \frac{1}{n}$ , then  $\sigma_1 = \frac{1}{\log n}$ .

## 485 Auxiliary Lemmas

486 In the following lemma, we will show that when all admissible distributions are not far away from the  
 487 data distribution  $\mu$  over stochastic state  $\mathcal{S}$  and action  $\mathcal{A}$ , we can have a good coverage of  $\mathcal{S} \times \mathcal{X} \times \mathcal{A}$   
 488 by generating virtual samples.

489 For a given dataset  $D$  of size  $|D| = n$  and data distribution  $\mu$ , let  $\bar{\mu}_\beta$  denote the expected distribution  
 490 of the the state action pair  $(s, x, a)$  in the combined dataset after using Algorithm 2 with a virtual  
 491 sample distribution  $\beta(x)$ .

**Lemma A.1.** *Given a virtual sample generating distribution  $\beta(x)$  of the pseudo-stochastic state, if  $\beta(x) \geq \sigma_1, \forall x \in \mathcal{B}$ . Then given any admissible distribution  $\nu$ , then under Assumptions A.3, we have for any  $(s, x, a) \in \mathcal{S} \times \mathcal{X} \times \mathcal{A}, x \in \mathcal{B}$ ,*

$$\frac{\nu(s, x, a)}{\bar{\mu}_\beta(s, x, a)} \leq \frac{(m+1)C}{m\sigma_1},$$

492 where

$$\bar{\mu}_\beta(s, x, a) = \mu(s, x, a) \frac{n}{nm+n} + \sum_{\hat{x} \in \mathcal{X}} \mu(s, \hat{x}, a) \left( \beta(x) \frac{nm}{nm+n} \right) \quad (8)$$

493 *Proof.* Given the data distribution  $\mu$ , we know that the real samples are drawn according to  $\mu(s, x, a)$ .  
 494 Then

$$\begin{aligned} \frac{\nu(s, x, a)}{\bar{\mu}_\beta(s, x, a)} &\leq \frac{\sum_{\hat{x} \in \mathcal{X}} \nu(s, \hat{x}, a)}{\bar{\mu}_\beta(s, x, a)} = \frac{\sum_{\hat{x} \in \mathcal{X}} \nu(s, \hat{x}, a)}{\sum_{\hat{x} \in \mathcal{X}} \mu(s, \hat{x}, a)} \times \frac{\sum_{\hat{x} \in \mathcal{X}} \mu(s, \hat{x}, a)}{\bar{\mu}_\beta(s, x, a)} \\ &= \frac{\nu(s, a)}{\mu(s, a)} \times \frac{\sum_{\hat{x} \in \mathcal{X}} \mu(s, \hat{x}, a)}{\bar{\mu}_\beta(s, x, a)} \\ &\leq_{(1)} C \times \frac{\mu(s, a)}{\bar{\mu}_\beta(s, x, a)} \\ &=_{(2)} C \left( \frac{\mu(s, a)}{\frac{\mu(s, x, a)}{m+1} + \frac{m}{m+1} \cdot \sum_{\hat{x} \in \mathcal{X}} \mu(s, \hat{x}, a) \beta(x)} \right) \\ &\leq C \left( \frac{(m+1)\mu(s, a)}{m \sum_{\hat{x} \in \mathcal{X}} \mu(s, \hat{x}, a) \beta(x)} \right) \\ &\leq C \left( \frac{(m+1)\mu(s, a)}{m \sum_{\hat{x} \in \mathcal{B}} \mu(s, \hat{x}, a) \beta(x)} \right) \\ &\leq C \cdot \frac{m+1}{m} \cdot \frac{1}{\sigma_1}, \end{aligned}$$

495 where the inequality (1) holds because of Assumption A.3, the equality (2) holds by substituting  
 496 equation (8) and the last inequality is true because the fact that  $\beta(x) \geq \sigma_1, \forall x \in \mathcal{B}$ .  $\square$

497 The next lemma transforms the norm in terms of distribution  $\nu$  to distribution  $\bar{\mu}_\beta$  (Eq. (8)).

**Lemma A.2.** *Let  $\nu$  be any admissible distribution,  $\bar{\mu}_\beta$  denote the new data distribution defined in Eq. (8) after generating virtual samples with  $\beta(x)$ . If  $\beta(x) \geq \sigma_1, \forall x \in \mathcal{B}$ , then under Assumption A.3, for any function  $f : \mathcal{S} \times \mathcal{X} \times \mathcal{A} \rightarrow \mathbb{R}$ , we have  $\|f\|_{2,\nu} \leq \sqrt{\frac{m+1}{m} \frac{C}{\sigma_1}} \|f\|_{2,\bar{\mu}_\beta}$ , where*

$$\|f\|_{2,\nu} = \left( \sum_{(s,x,a) \in \mathcal{S} \times \mathcal{X} \times \mathcal{A}, x \in \mathcal{B}} |f(s, x, a)|^2 \nu(s, x, a) \right)^{1/2}.$$

498 *Proof.* For any function  $f$ , we have

$$\|f\|_{2,\nu} = \left( \sum_{(s,x,a) \in \mathcal{S} \times \mathcal{X} \times \mathcal{A}, x \in \mathcal{B}} |f(s, x, a)|^2 \nu(s, x, a) \right)^{1/2}$$

$$\begin{aligned}
&\leq \left( \sum_{(s,x,a) \in \mathcal{S} \times \mathcal{X} \times \mathcal{A}, x \in \mathcal{B}} |f(x, x, a)|^2 \bar{\mu}_\beta(s, x, a) \frac{(m+1)C}{m\sigma_1} \right)^{1/2} \\
&\leq \sqrt{\frac{(m+1)C}{m\sigma_1}} \|f\|_{2, \bar{\mu}_\beta},
\end{aligned}$$

where the first inequality is a result of Lemma A.1.  $\square$

**Lemma A.3.** Consider two functions  $f, f' : \mathcal{S} \times \mathcal{X} \times \mathcal{A} \rightarrow \mathbb{R}$  and define a policy  $\pi_{f, f'}(s, x) := \arg \min_{a \in \mathcal{A}} \min \{f(s, x, a), f'(s, x, a)\}$ . Then we have  $\forall \nu \in \Delta(\mathcal{S} \times \mathcal{X} \times \mathcal{A})$ ,

$$\|V_f - V_{f'}\|_{2, P(\nu)} = \|f - f'\|_{2, P(\nu) \times \pi_{f, f'}}. \quad (9)$$

*Proof.*

$$\begin{aligned}
&\|V_f - V_{f'}\|_{2, P(\nu)}^2 \\
&= \sum_{(s,x,a) \in \mathcal{S} \times \mathcal{X} \times \mathcal{A}} \sum_{s' \in \mathcal{S}} P(s'|s, a) \left( \min_{a' \in \mathcal{A}} f(s', g(s, x, a, s'), a') - \min_{a' \in \mathcal{A}} f'(s', g(s, x, a, s'), a') \right)^2 \\
&\leq \sum_{(s,x,a) \in \mathcal{S} \times \mathcal{X} \times \mathcal{A}} \sum_{s' \in \mathcal{S}} P(s'|s, a) (f(s', g(s, x, a, s'), \pi_{f, f'}(s', g(s, x, a, s')))) \\
&\quad - f'(s', g(s, x, a, s'), \pi_{f, f'}(s', g(s, x, a, s'))))^2 \\
&= \|f - f'\|_{2, P(\nu) \times \pi_{f, f'}}^2.
\end{aligned}$$

502  $\square$

**Lemma A.4.** Under Assumptions A.3 and A.4, for any admissible distribution  $\nu \in \Delta(\mathcal{S} \times \mathcal{X} \times \mathcal{A})$ , and a data distribution  $\bar{\mu}_\beta$  associated with a virtual sample distribution  $\beta(x)$ , define  $P(\nu)$  as a distribution generated as  $s'_i \sim P(\nu)$ , then for any policy  $\pi$ , and  $f, f' : \mathcal{S} \times \mathcal{X} \times \mathcal{A} \rightarrow \mathbb{R}$ , we have

$$\|f - Q^*\|_{2, \nu} \leq \sqrt{\frac{(m+1)C}{m\sigma}} \|f - \mathcal{T}f'\|_{2, \bar{\mu}_\beta} + \gamma \|f' - Q^*\|_{2, P(\nu) \times \pi_{f', Q^*}} \quad (10)$$

*Proof.*

$$\begin{aligned}
&\|f - Q^*\|_{2, \nu} = \|f - \mathcal{T}f' + \mathcal{T}f' - Q^*\|_{2, \nu} \\
&\leq_{(1)} \|f - \mathcal{T}f'\|_{2, \nu} + \|\mathcal{T}f' - Q^*\|_{2, \nu} \\
&\leq_{(2)} \sqrt{\frac{(m+1)C}{m\sigma}} \|f - \mathcal{T}f'\|_{2, \bar{\mu}_\beta} + \|\mathcal{T}f' - Q^*\|_{2, \nu} \\
&\leq_{(3)} \sqrt{\frac{(m+1)C}{m\sigma}} \|f - \mathcal{T}f'\|_{2, \bar{\mu}_\beta} + \gamma \|V_{f'} - V^*\|_{2, P(\nu)} \\
&\leq \sqrt{\frac{(m+1)C}{m\sigma}} \|f - \mathcal{T}f'\|_{2, \bar{\mu}_\beta} + \gamma \|f' - Q^*\|_{2, P(\nu) \times \pi_{f', Q^*}},
\end{aligned}$$

where inequality (1) holds because of triangle inequality, inequality (2) comes from lemma A.2, inequality (3) holds because

$$\begin{aligned}
\|\mathcal{T}f' - Q^*\|_{2, \nu}^2 &= \|\mathcal{T}^*f' - \mathcal{T}Q^*\|_{2, \nu}^2 = \mathbb{E}_{(s,x,a) \sim \nu} \left[ ((\mathcal{T}f')(s, x, a) - (\mathcal{T}Q^*)(s, x, a))^2 \right] \\
&= \mathbb{E}_{(s,x,a) \sim \nu} \left[ \left( \gamma \mathbb{E}_{s' \sim P(\cdot|s,a)} [V_{f'}(s', g(s, x, a, s')) - V^*(s', g(s, x, a, s'))] \right)^2 \right] \\
&\leq \gamma^2 \mathbb{E}_{(s,x,a) \sim \nu, s' \sim P(\cdot|s,a)} \left[ (V_{f'}(s', g(s, x, a, s')) - V^*(s', g(s, x, a, s')))^2 \right] \\
&= \gamma^2 \mathbb{E}_{s' \sim P(\nu)} \left[ (V_{f'}(s', g(s, x, a, s')) - V^*(s', g(s, x, a, s')))^2 \right] \\
&= \gamma^2 \|V_{f'} - V^*\|_{2, P(\nu)}^2,
\end{aligned}$$

and the last inequality holds due to Lemma A.3.  $\square$

509

510 **Lemma A.5.** For a given data sample  $(s, x, a, r, s', a')$  generated from a data distribution  $\mu$ ,  
 511 such that  $(s, x, a) \sim \mu$ ,  $s' \sim P(\cdot|s, a)$ ,  $x' = g(s, x, a, s')$ , for any  $f, f' \in \mathcal{F}$ , define  $V_f(s, x) =$   
 512  $\min_{a'} f(s, x, a')$ , then

$$\begin{aligned} & \mathbb{E} \left[ (f(s, x, a) - r - \gamma V_{f'}(s', x'))^2 \right] \\ &= \|f - \mathcal{T}f'\|_{2, \mu}^2 + \gamma^2 \mathbb{E}_{(s, x, a) \sim \mu} [\text{Var}(V_{f'}(s', x')|s, x, a)] \end{aligned} \quad (11)$$

*Proof.*

$$\begin{aligned} & \mathbb{E} \left[ (f(s, x, a) - r - \gamma V_{f'}(s', x'))^2 \right] \\ &= \mathbb{E} \left[ (f(s, x, a) - (\mathcal{T}f')(s, x, a) + (\mathcal{T}f')(s, x, a) - (r + \gamma V_{f'}(s', x')))^2 \right] \\ &= \mathbb{E} \left[ (f(s, x, a) - (\mathcal{T}f')(s, x, a))^2 \right] + \mathbb{E} \left[ ((\mathcal{T}f')(s, x, a) - (r + \gamma V_{f'}(s', x')))^2 \right] \\ & \quad + \underbrace{2\mathbb{E} [(f(s, x, a) - (\mathcal{T}f')(s, x, a)) ((\mathcal{T}f')(s, x, a) - (r + \gamma V_{f'}(s', x')))]}_{(1)=0} \\ &= \mathbb{E} \left[ (f(s, x, a) - (\mathcal{T}f')(s, x, a))^2 \right] + \gamma^2 \mathbb{E}_{(s, x, a) \sim \mu} [\text{Var}(V_{f'}(s', x')|s, x, a)] \\ &= \|f - \mathcal{T}f'\|_{2, \mu}^2 + \gamma^2 \mathbb{E}_{(s, x, a) \sim \mu} [\text{Var}(V_{f'}(s', x')|s, x, a)], \end{aligned}$$

513 where the equation (1) = 0 because that condition on  $(s, x, a)$ , we have  $f$  and  $V_{f'}$  are independent.  
 514  $\square$

515 **Lemma A.6.** Under Algorithm 2, at iteration  $k$ , we have

$$\mathcal{L}_{\hat{\mu}_{\beta_k}}(f; f') - \mathcal{L}_{\hat{\mu}_{\beta_k}}(\mathcal{T}f; f') = \|f - \mathcal{T}f'\|_{2, \hat{\mu}_{\beta_k}}^2, \quad (12)$$

516 where  $\mathcal{L}_{\hat{\mu}_{\beta_k}}(f; f') = \mathbb{E}[\mathcal{L}_{\hat{D}_k}(f; f')]$ .

517 *Proof.* Recall that  $\hat{D}_k = D \cup D_k$  and  $|\hat{D}_k| = nm + n$ . The expectation is w.r.t. the random draw of  
 518 the dataset  $D$  and the random generation of dataset  $D_k$  with virtual sample distribution  $\beta_k$ . We know  
 519 that

$$\begin{aligned} \mathcal{L}_{\hat{D}_k}(f; f') &= \frac{1}{|\hat{D}_k|} \sum_{(s, x, a, r, s', x') \in D} (f(s, x, a) - r - \gamma V_{f'}(s', x'))^2 \\ & \quad + \frac{1}{|\hat{D}_k|} \sum_{(s, x, a, r, s', x') \in D_k} (f(s, x, a) - r - \gamma V_{f'}(s', x'))^2 \end{aligned}$$

520 Let  $\mathcal{M}_k^{(s, x, a, s', x')}$  denote the set of virtual samples that are associated with the real sample  
 521  $(s, x, a, s', x')$  at iteration  $k$ . Then

$$\begin{aligned} & \mathcal{L}_{\hat{\mu}_{\beta_k}}(f; f') := \mathbb{E}[\mathcal{L}_{\hat{D}_k}(f; f')] \\ &= \frac{n}{nm + n} (\|f - \mathcal{T}f'\|_{2, \mu}^2 + \gamma^2 \mathbb{E}_{(s, x, a) \sim \mu} [\text{Var}(V_{f'}(s', x')|s, x, a)]) \quad (\text{by using Lemma A.5}) \\ & \quad + \frac{1}{nm + n} \mathbb{E} \left[ \sum_{(s, x, a, r, s', x') \in D} \sum_{(s, \bar{x}, a, \bar{r}, \bar{s}', \bar{x}') \in \mathcal{M}_k^{(s, x, a, r, s', x')}} (f(s, \bar{x}, a) - \bar{r} - \gamma V_{f'}(\bar{s}', \bar{x}'))^2 \right] \\ &= \frac{n}{nm + n} (\|f - \mathcal{T}f'\|_{2, \mu}^2 + \gamma^2 \mathbb{E}_{(s, x, a) \sim \mu} [\text{Var}(V_{f'}(s', x')|s, x, a)]) \\ & \quad + \frac{1}{nm + n} \mathbb{E} \left[ \sum_{(s, x, a, r, s', x') \in D} \mathbb{E} \left[ \sum_{(s, \bar{x}, a, \bar{r}, \bar{s}', \bar{x}') \in \mathcal{M}_k^{(s, x, a, r, s', x')}} (f(s, \bar{x}, a) - \bar{r} - \gamma V_{f'}(\bar{s}', \bar{x}'))^2 \middle| s, x, a, r, s', x' \right] \right] \\ &= \frac{n}{nm + n} (\|f - \mathcal{T}f'\|_{2, \mu}^2 + \gamma^2 \mathbb{E}_{(s, x, a) \sim \mu} [\text{Var}(V_{f'}(s', x')|s, x, a)]) \end{aligned}$$

$$\begin{aligned}
& + \frac{m}{nm+n} \mathbb{E} \left[ \sum_{(s,x,a,r,s',x') \in D} \sum_{\bar{x} \in \mathcal{X}} \beta_k(\bar{x}) (f(s, \bar{x}, a) - \bar{r} - \gamma V_{f'}(\bar{s}', \bar{x}'))^2 \right] \\
& = \frac{n}{nm+n} (\|f - \mathcal{T}f'\|_{2,\mu}^2 + \gamma^2 \mathbb{E}_{(s,x,a) \sim \mu} [\text{Var}(V_{f'}(s', x') | s, x, a)]) \\
& + \frac{mn}{nm+n} \sum_{(s,x,a) \in \mathcal{S} \times \mathcal{X} \times \mathcal{A}} \mu(s, x, a) \sum_{\bar{x} \in \mathcal{X}} \beta_k(\bar{x}) (f(s, \bar{x}, a) - \bar{r} - \gamma V_{f'}(\bar{s}', \bar{x}'))^2 \\
& = \frac{n}{nm+n} (\|f - \mathcal{T}f'\|_{2,\mu}^2 + \gamma^2 \mathbb{E}_{(s,x,a) \sim \mu} [\text{Var}(V_{f'}(s', x') | s, x, a)]) \\
& + \frac{mn}{nm+n} \sum_{(s,\bar{x},a) \in \mathcal{S} \times \mathcal{X} \times \mathcal{A}} \mu(s, a) \beta_k(\bar{x}) (f(s, \bar{x}, a) - \bar{r} - \gamma V_{f'}(\bar{s}', \bar{x}'))^2 \\
& = \frac{n}{nm+n} (\|f - \mathcal{T}f'\|_{2,\mu}^2 + \gamma^2 \mathbb{E}_{(s,x,a) \sim \mu} [\text{Var}(V_{f'}(s', x') | s, x, a)]) \\
& + \frac{nm}{nm+n} (\|f - \mathcal{T}f'\|_{2,\mu_k}^2 + \gamma^2 \mathbb{E}_{(s,x,a) \sim \mu_k} [\text{Var}(V_{f'}(s', x') | s, x, a)]) , \quad (\text{by using Lemma A.5})
\end{aligned}$$

522 where  $\bar{r} = R(s, \bar{x}, a)$ ,  $\mu_k(s, x, a) = \sum_{x' \in \mathcal{X}} \mu(s, x', a) \beta_k(x) = \mu(s, a) \beta_k(x)$ . Since we have  
523  $\bar{\mu}_{\beta_k}(s, x, a) = \frac{1}{m+1} \mu(s, x, a) + \frac{m}{m+1} \mu(s, a) \beta_k(x)$ .

524 Therefore,

$$\mathcal{L}_{\bar{\mu}_{\beta_k}}(f; f') - \mathcal{L}_{\bar{\mu}_{\beta_k}}(\mathcal{T}f'; f') = \|f - \mathcal{T}f'\|_{2,\bar{\mu}_{\beta_k}}^2.$$

525

□

526 The next lemma shows an upper bound on  $\|f_{k+1} - \mathcal{T}f_k\|_{2,\bar{\mu}_{\beta_k}}^2$ .

527 **Lemma A.7.** *Given the MDP  $M = (\mathcal{S}, \mathcal{X}, P, R, \gamma)$ , we assume that the  $Q$ -function classes  $\mathcal{F}$   
528 satisfies  $\forall f \in \mathcal{F}, \mathcal{T}f \in \mathcal{F}$ . The dataset  $D$  is generated as:  $(s, x, a) \sim \mu, r = R(s, x, a), s' \sim$   
529  $P(\cdot | s, a), x' = g(s, x, a, s')$ , and the new dataset  $\hat{D}_k = D \cup D_k$  is generated by following Alg. 1  
530 with virtual sample generating distribution  $\beta_k(x)$  at  $k$ th iteration. Then with probability at least  
531  $1 - \delta, \forall f \in \mathcal{F}$ , and  $k = 0, \dots, K$  we have*

$$\|f_{k+1} - \mathcal{T}f_k\|_{2,\bar{\mu}_{\beta_k}}^2 \leq 5 \left( \frac{1}{n} + \frac{1}{m} \right) V_{\max}^2 \log(nK|\mathcal{F}|^2/\delta) + \frac{3\delta V_{\max}^2}{n} \quad (13)$$

532 *Proof.* Using Lemma A.6 we know that

$$\|f - \mathcal{T}f'\|_{2,\bar{\mu}_{\beta_k}}^2 = \mathcal{L}_{\bar{\mu}_{\beta_k}}(f; f') - \mathcal{L}_{\bar{\mu}_{\beta_k}}(\mathcal{T}f; f').$$

Then it is sufficient to bound  $\|f - \mathcal{T}f'\|_{2,\bar{\mu}_{\beta_k}}^2$  by bounding

$$\mathcal{L}_{\bar{\mu}_{\beta_k}}(f; f') - \mathcal{L}_{\bar{\mu}_{\beta_k}}(\mathcal{T}f; f') = \mathbb{E}[\mathcal{L}_{\hat{D}_k}(f; f') - \mathcal{L}_{\hat{D}_k}(\mathcal{T}f; f')].$$

533 For any  $f, f'$ , recall that

$$\begin{aligned}
\mathcal{L}_{\hat{D}_k}(f; f') & = \frac{1}{|\hat{D}_k|} \underbrace{\sum_{(s,x,a,r,s',x') \in D} (f(s, x, a) - r - \gamma V_{f'}(s', x'))^2}_{\mathcal{L}_D(f; f')} \\
& + \frac{1}{|\hat{D}_k|} \underbrace{\sum_{(s,x,a,r,s',x') \in D_k} (f(s, x, a) - r - \gamma V_{f'}(s', x'))^2}_{\mathcal{L}_{D_k}(f; f')}.
\end{aligned}$$

534 For any  $f, f'$  define

$$Y(f; f') := (f(s, x, a) - r - \gamma V_{f'}(s', x'))^2 - (\mathcal{T}f(s, x, a) - r - \gamma V_{f'}(s', x'))^2$$

535 Then for each  $(s, x, a, s', x') \in D$ , we get i.i.d. variables  $Y_1(f; f'), \dots, Y_n(f; f')$ .

536 We also define

$$X_i(f; f') := (f(s_i, \hat{x}_i, a_i) - \hat{r}_i - \gamma V_{f'}(s_i', \hat{x}_i'))^2 - (\mathcal{T}f'(s_i, \hat{x}_i, a_i) - \hat{r}_i - \gamma V_{f'}(s_i', \hat{x}_i'))^2,$$

537 where  $(s_i, \hat{x}_i, a_i, \hat{r}_i, s_i', \hat{x}_i')$  is an augmented sample based on the  $i$ th real sample  $(s_i, x_i, a_i, r_i, s_i', x_i')$ .

538 Denote the  $m$  i.i.d virtual samples by  $X_{i_1}(f; f'), \dots, X_{i_m}(f; f')$ . Therefore

$$\mathcal{L}_{\hat{D}_k}(f; f') - \mathcal{L}_{\hat{D}_k}(\mathcal{T}f'; f') = \frac{n}{nm+n} \times \frac{1}{n} \sum_{i=1}^n Y_i(f; f') + \frac{nm}{nm+n} \times \frac{1}{nm} \sum_{i=1}^n \sum_{j=1}^m X_{i_j}(f; f'). \quad (14)$$

539 Taking the expectations on both sides, we obtain for any  $f, f' \in \mathcal{F}$ ,

$$\mathcal{L}_{\hat{\mu}_{\beta_k}}(f; f') - \mathcal{L}_{\hat{\mu}_{\beta_k}}(\mathcal{T}f'; f') = \frac{n}{nm+n} \mathbb{E}[Y(f; f')] + \frac{nm}{nm+n} \times \frac{1}{n} \mathbb{E} \left[ \sum_{i=1}^n X_i(f; f') \right]$$

540 We need to introduce  $\frac{1}{n} \sum_{i=1}^n Y_i(f; f')$  and  $\frac{1}{m} \sum_{i=1}^n \sum_{j=1}^m X_{i_j}(f; f')$  to bound the above terms.

541 For the first term, we know that the variance of  $Y$  can be bounded by:

$$\begin{aligned} \text{Var}(Y(f; f')) &\leq \mathbb{E}[Y(f; f')^2] \\ &= \mathbb{E}[(f(s, x, a) - r - \gamma V_{f'}(s', x'))^2 - (\mathcal{T}f'(s, x, a) - r - \gamma V_{f'}(s', x'))^2]^2 \\ &= \mathbb{E}[(f(s, x, a) - \mathcal{T}f'(s, x, a))^2 (f(s, x, a) + \mathcal{T}f'(s, x, a) - 2r - 2\gamma V_{f'}(s', x'))^2] \\ &\leq 4V_{\max}^2 \mathbb{E}[(f(s, x, a) - \mathcal{T}f'(s, x, a))^2] \\ &= 4V_{\max}^2 \|f - \mathcal{T}f'\|_{2,\mu}^2 \\ &= 4V_{\max}^2 \mathbb{E}[Y(f; f')], \end{aligned} \quad (15)$$

542 where the last equality is true because

$$\begin{aligned} \mathbb{E}[Y(f; f')] &= \mathbb{E}[\mathcal{L}_D(f; f')] - \mathbb{E}[\mathcal{L}_D(\mathcal{T}f'; f')] \\ &= \|f - \mathcal{T}f'\|_{2,\mu}^2 + \gamma^2 \mathbb{E}_{(s,x,a) \sim \mu} [\text{Var}(V_{f'}(s', x') | s, x, a)] \\ &\quad - \|\mathcal{T}f' - \mathcal{T}f'\|_{2,\mu}^2 - \gamma^2 \mathbb{E}_{(s,x,a) \sim \mu} [\text{Var}(V_{f'}(s', x') | s, x, a)] \quad (\text{using Lemma A.5}) \\ &= \|f - \mathcal{T}f'\|_{2,\mu}^2. \end{aligned}$$

543 Then by applying Bernstein's inequality, together with a union bound over all  $f, f' \in \mathcal{F}$ , we obtain

544 with probability  $1 - \delta$  we have

$$\begin{aligned} \mathbb{E}[Y(f; f')] - \frac{1}{n} \sum_{i=1}^n Y_i(f; f') &\leq \sqrt{\frac{2\text{Var}(Y(f; f')) \log(|\mathcal{F}|^2/\delta)}{n}} + \frac{4V_{\max}^2 \log(|\mathcal{F}|^2/\delta)}{3n} \\ &\leq \sqrt{\frac{8V_{\max}^2 \mathbb{E}[Y(f; f')] \log(|\mathcal{F}|^2/\delta)}{n}} + \frac{4V_{\max}^2 \log(|\mathcal{F}|^2/\delta)}{3n} \end{aligned} \quad (16)$$

545 For the second term, note that for any given  $i$ th sample  $(s_i, x_i, a_i, s_i', x_i')$  all the variables  $\{X_{i_j}\}$  are

546 i.i.d. Then following a similar argument, then for all  $f, f' \in \mathcal{F}$ , we have with probability at least

547  $1 - \delta/n$ ,

$$\begin{aligned} \mathbb{E}[X_i(f; f') | s_i, x_i, a_i] - \frac{1}{m} \sum_{j=1}^m X_{i_j}(f; f') \\ \leq \sqrt{\frac{8V_{\max}^2 \mathbb{E}[X_i(f; f') | s_i, x_i, a_i] \log(n|\mathcal{F}|/\delta)}{m}} + \frac{4V_{\max}^2 \log(n|\mathcal{F}|/\delta)}{3m} \end{aligned}$$

548 Then it is easy to obtain that we have for all  $f, f' \in \mathcal{F}$ ,

$$\frac{1}{n} \sum_{i=1}^n \mathbb{E} \left[ X_i(f; f') - \frac{1}{m} \sum_{j=1}^m X_{i_j}(f; f') \right]$$

$$\leq \frac{1}{n} \sum_{i=1}^n \left( \sqrt{\frac{8V_{\max}^2 \mathbb{E}[X_i(f; f')] \log(n|\mathcal{F}|/\delta)}{m}} + \frac{4V_{\max}^2 \log(n|\mathcal{F}|^2/\delta)}{3m} \right) + \frac{\delta V_{\max}^2}{n} \quad (17)$$

549 Combining Eq.(17) and Eq.(16) we can obtain with probability at least  $1 - \delta$ , for all  $f, f' \in \mathcal{F}$ ,

$$\begin{aligned} & \frac{n}{n+nm} \times \mathbb{E}[Y(f; f')] - \frac{n}{n+nm} \times \frac{1}{n} \sum_{i=1}^n Y_i(f; f') + \frac{nm}{nm+n} \times \frac{1}{n} \sum_{i=1}^n \mathbb{E} \left[ X_i(f; f') - \frac{1}{m} \sum_{j=1}^m X_{i_j}(f; f') \right] \\ & \leq \frac{1}{1+m} \times \left( \sqrt{\frac{8V_{\max}^2 \mathbb{E}[Y(f; f')] \log(|\mathcal{F}|^2/\delta)}{n}} + \frac{4V_{\max}^2 \log(|\mathcal{F}|^2/\delta)}{3n} \right) \\ & \quad + \frac{nm}{nm+n} \left( \frac{1}{n} \sum_{i=1}^n \left( \sqrt{\frac{8V_{\max}^2 \mathbb{E}[X_i(f; f')] \log(n|\mathcal{F}|/\delta)}{m}} + \frac{4V_{\max}^2 \log(n|\mathcal{F}|^2/\delta)}{3m} \right) + \frac{\delta V_{\max}^2}{n} \right) \end{aligned} \quad (18)$$

Let  $f = f_{k+1}$ ,  $f' = f_k$ , then according to Algorithm 2 we know that

$$f_{k+1} = \hat{\mathcal{T}}_{k, \mathcal{F}} f_k := \arg \min_{f \in \mathcal{F}} \mathcal{L}_{\hat{\mathcal{D}}_k}(f; f_k).$$

550 According to Eq. (14), we have

$$\mathcal{L}_{\hat{\mathcal{D}}_k}(f; f_k) - \mathcal{L}_{\hat{\mathcal{D}}_k}(\mathcal{T}f_k; f_k) = \frac{n}{nm+n} \times \frac{1}{n} \sum_{i=1}^n Y_i(f; f_k) + \frac{nm}{nm+n} \times \frac{1}{nm} \sum_{i=1}^n \sum_{j=1}^m X_{i_j}(f; f_k).$$

Then it is easy to observe that  $\hat{\mathcal{T}}_{k, \mathcal{F}} f_k$  minimizes  $\mathcal{L}_{\hat{\mathcal{D}}_k}(\cdot; f_k)$ , it also minimizes

$$\frac{n}{nm+n} \times \frac{1}{n} \sum_{i=1}^n Y_i(\cdot; f_k) + \frac{nm}{nm+n} \times \frac{1}{nm} \sum_{i=1}^n \sum_{j=1}^m X_{i_j}(\cdot; f_k)$$

551 because the two objectives only differ by a constant  $\mathcal{L}_{\hat{\mathcal{D}}_k}(\mathcal{T}f_k; f_k)$ . Therefore under assumption A.2  
552 we know that  $\mathcal{T}f_k \in \mathcal{F}$ , we are able to obtain that

$$\begin{aligned} & \frac{1}{nm+n} \sum_{i=1}^n Y_i(\hat{\mathcal{T}}_{k, \mathcal{F}} f_k; f_k) + \frac{1}{mn+n} \sum_{i=1}^n \sum_{j=1}^m X_{i_j}(\hat{\mathcal{T}}_{k, \mathcal{F}} f_k; f_k) \\ & \leq \frac{1}{nm+n} \sum_{i=1}^n Y_i(\mathcal{T}f_k; f_k) + \frac{1}{nm+n} \sum_{i=1}^n \sum_{j=1}^m X_{i_j}(\mathcal{T}f_k; f_k) = 0, \end{aligned} \quad (19)$$

553 where the last equality holds due to the definitions of  $Y_i$  and  $X_{i_j}$ . Therefore plugging the result from  
554 Eq.(19) into Eq.(18), we can obtain

$$\begin{aligned} & \frac{1}{m+1} \mathbb{E}[Y(f_{k+1}; f_k)] + \frac{m}{mn+n} \sum_{i=1}^n \mathbb{E}[X_i(f_{k+1}; f_k)] \\ & \leq \frac{1}{1+m} \left( \sqrt{\frac{8V_{\max}^2 \mathbb{E}[Y(f_{k+1}; f_k)] \log(|\mathcal{F}|^2/\delta)}{n}} + \frac{4V_{\max}^2 \log(|\mathcal{F}|^2/\delta)}{3n} \right) \\ & \quad + \frac{nm}{nm+n} \left( \frac{1}{n} \sum_{i=1}^n \left( \sqrt{\frac{8V_{\max}^2 \mathbb{E}[X_i(f_{k+1}; f_k)] \log(n|\mathcal{F}|^2/\delta)}{m}} + \frac{4V_{\max}^2 \log(n|\mathcal{F}|^2/\delta)}{3m} \right) + \frac{\delta V_{\max}^2}{n} \right) \end{aligned}$$

555 By solving the quadratic formula, we get

$$\begin{aligned} & \mathcal{L}_{\hat{\mu}_{\beta_k}}(f_{k+1}; f_k) - \mathcal{L}_{\hat{\mu}_{\beta_k}}(\mathcal{T}f_k; f_k) = \|f_{k+1} - \mathcal{T}f_k\|_{2, \hat{\mu}_{\beta_k}}^2 \\ & = \frac{1}{m+1} \mathbb{E}[Y(f_{k+1}; f_k)] + \frac{m}{nm+n} \sum_{j=1}^n \mathbb{E}[X_i(f_{k+1}; f_k)] \\ & \leq 5 \left( \frac{1}{n} + \frac{1}{m} \right) V_{\max}^2 \log(n|\mathcal{F}|^2/\delta) + \frac{3\delta V_{\max}^2}{n} \end{aligned}$$

556 Finally, apply a union bound over all  $t = 0 \dots K$ , we conclude the proof.

557

□

## 558 A.1 Proof of Theorem 1

559 Now we are ready to show the main theorem. Given a dataset  $D$ . After generating virtual samples  
 560  $D_k$  we get a new combined dataset  $\hat{D}_k = D \cup D_k$  at each iteration  $k$  with virtual sample generating  
 561 distribution  $\beta_k(x)$ . We first have

$$\begin{aligned}
 v^{\pi_{f_k}} - v^* &= \frac{1}{1-\gamma} \mathbb{E}_{(s,x) \sim d_{\eta_0}^{\pi_{f_k}}(s,x)} [Q^*(s,x,\pi_{f_k}) - V^*(s,x)] \\
 &\leq \frac{1}{1-\gamma} \mathbb{E}_{(s,x) \sim d_{\eta_0}^{\pi_{f_k}}(s,x)} [Q^*(s,x,\pi_{f_k}) - f_k(s,x,\pi_{f_k}) + f_k(s,x,\pi^*) - V^*(s,x)] \\
 &\leq \frac{1}{1-\gamma} \left( \|Q^* - f_k\|_{1,d_{\eta_0}^{\pi_{f_k}}(s,x) \times \pi_{f_k}} + \|Q^* - f_k\|_{1,d_{\eta_0}^{\pi_{f_k}}(s,x) \times \pi^*} \right) \\
 &\leq \frac{1}{1-\gamma} \left( \|Q^* - f_k\|_{2,d_{\eta_0}^{\pi_{f_k}}(s,x) \times \pi_{f_k}} + \|Q^* - f_k\|_{2,d_{\eta_0}^{\pi_{f_k}}(s,x) \times \pi^*} \right), \tag{20}
 \end{aligned}$$

562 where the first equality follows from the performance difference lemma (Kakade and Langford, 2002),  
 563 the first inequality holds because  $\pi_{f_k} \in \arg \min_a f_k(s,x,a)$  and the last inequality is true by using  
 564 the fact that for any vector  $a = (a_1, \dots, a_n)$  and a valid distribution  $d = (d_1, \dots, d_n)$ ,  $\sum_i d_i = 1$

$$\begin{aligned}
 \|a\|_{1,d} &= \sum_i |a_i| d_i = \sum_i |a_i| \sqrt{d_i} \sqrt{d_i} \quad (\text{Cauchy-Schwarz inequality}) \\
 &\leq \sqrt{\sum_i d_i} \times \sqrt{\sum_i |a_i|^2 d_i} = \|a\|_{2,d}.
 \end{aligned}$$

565 According to Assumption A.4, we know that  $\sum_{s \in S} \sum_{x \in \mathcal{X}, x \notin \mathcal{B}} d_{\eta_0}^{\pi_{f_k}}(s,x) \leq \sigma_2$ , which implies that  
 566  $\sum_{(s,x,a) \in S \times \mathcal{X} \times \mathcal{A}, x \notin \mathcal{B}} \{d_{\eta_0}^{\pi_{f_k}}(s,x) \times \pi^*\}(s,x,a) \leq \sigma_2$ , and  $\sum_{(s,x,a) \in S \times \mathcal{X} \times \mathcal{A}, x \notin \mathcal{B}} \{d_{\eta_0}^{\pi_{f_k}}(s,x) \times$   
 567  $\pi_{f_k}\}(s,x,a) \leq \sigma_2$ . Define  $\xi = \{d_{\eta_0}^{\pi_{f_k}}(s,x) \times \pi_{f_k}\}(s,x,a)$ , then we have

$$\begin{aligned}
 \|f_k - Q^*\|_{2,\xi} &= \left( \sum_{(s,x,a) \in S \times \mathcal{X} \times \mathcal{A}} |f_k(s,x,a) - Q^*(s,x,a)|^2 \xi(s,x,a) \right)^{1/2} \\
 &\leq \left( \sum_{(s,x,a) \in S \times \mathcal{X} \times \mathcal{A}, x \in \mathcal{B}} |f_k(s,x,a) - Q^*(s,x,a)|^2 \xi(s,x,a) \right)^{1/2} \\
 &\quad + \left( \sum_{(s,x,a) \in S \times \mathcal{X} \times \mathcal{A}, x \notin \mathcal{B}} |f_k(s,x,a) - Q^*(s,x,a)|^2 \xi(s,x,a) \right)^{1/2} \\
 &\leq \|f_k - Q^*\|_{2,\xi} + \sqrt{\sigma_2} V_{\max} \\
 &\leq \sqrt{\frac{(m+1)C}{m\sigma_1}} \|f_k - \mathcal{T}f_{k-1}\|_{2,\bar{\mu}_{\beta_k}} + \gamma \|f_{k-1} - Q^*\|_{2,P(\xi) \times \pi_{f_{k-1},Q^*}} + \sqrt{\sigma_2} V_{\max}, \tag{21}
 \end{aligned}$$

568 where the first inequality holds because  $\sqrt{a+b} \leq \sqrt{a} + \sqrt{b}$  ( $a \geq 0, b \geq 0$ ) and the last inequality  
 569 comes from Lemma A.4.

570 By using Lemma A.7 we have with at least probability  $1 - \delta$

$$\|f_k - \mathcal{T}f_{k-1}\|_{2,\bar{\mu}_{\beta_k}}^2 \leq \|f_k - \mathcal{T}f_{k-1}\|_{2,\bar{\mu}_{\beta_k}}^2 \leq \epsilon_1 \tag{22}$$

571 where  $\epsilon_1 = 5 \left( \frac{1}{n} + \frac{1}{m} \right) V_{\max}^2 \log(nK|\mathcal{F}|^2/\delta) + \frac{3\delta V_{\max}^2}{n}$ . Therefore, we obtain

$$\|f_k - Q^*\|_{2,\xi} \leq \gamma \|f_{k-1} - Q^*\|_{2,P(\xi) \times \pi_{f_{k-1},Q^*}} + \sqrt{\frac{(m+1)C\epsilon_1}{m\sigma_1}} + \sqrt{\sigma_2} V_{\max}. \tag{23}$$

572 Now define  $\xi' = P(\xi) \times \pi_{f_{k-1},Q^*}$ . Then based on Assumption A.4, it is easy to obtain  
 573  $\sum_{(s,x,a) \in S \times \mathcal{X} \times \mathcal{A}, x \notin \mathcal{B}} \xi'(s,x,a) \leq c_0 \sigma_2$ . Note that the distribution  $\xi'' = P(\xi') \times \pi_{f_{k-2},Q^*}$  still sat-  
 574 isfies  $\sum_{(s,x,a) \in S \times \mathcal{X} \times \mathcal{A}, x \notin \mathcal{B}} \xi''(s,x,a) \leq c_0 \sigma_2$  according to Assumption A.4, because  $\pi_{f_{k-1}}, \pi_{f_{k-2}}$   
 575 and  $Q^*$  are all assumed to be reasonable policies.

576 Repeating the expansion above for  $k$  times, we have

$$\|f_k - Q^*\|_{2,\xi} \leq \frac{1 - \gamma^k}{1 - \gamma} \left( \sqrt{\frac{(m+1)C\epsilon_1}{m\sigma_1}} + \sqrt{c_0\sigma_2}V_{\max} \right) + \gamma^k V_{\max}.$$

577 All the above analyses are still applied to the case when  $\xi = \{d_{\eta_0}^{\pi_{f_k}}(s, x) \times \pi^*\}$ . Therefore, it is  
578 straightforward to obtain

$$v^* - v^{\pi_{f_k}} \leq \frac{2}{(1 - \gamma)^2} \left( \sqrt{\frac{(m+1)C\epsilon_1}{m\sigma_1}} + \sqrt{c_0\sigma_2}V_{\max} + \gamma^k(1 - \gamma)V_{\max} \right). \quad (24)$$

579 Substituting  $\epsilon_1$  completes the proof.

## 580 A.2 Extension of Theorem 1

581 We repeat the assumption for extending our main results to the case when  $|\mathcal{X}|$  can be infinite such  
582 that  $f(s, x, a)$  may not be bounded by  $V_{\max}$ .

583 **Repeat of Assumption 1:** For the typical set  $\mathcal{B}$  of pseudo-stochastic states (defined in Assump-  
584 tion A.4), for any  $s, a \in \mathcal{S} \times \mathcal{A}, f \in \mathcal{F}$ , if  $x \in \mathcal{B}$ , then  $f(s, x, a) \leq V_{\max}$  otherwise if  $x \notin \mathcal{B}$ , we  
585 have  $|f(s, x, a) - Q^*(s, x, a)| \leq V_{\max}$ . Furthermore, for any given  $f \in \mathcal{F}, (s, x), x \in \mathcal{B}$ , we have  
586  $|V_f(s', x') - V_f(s'', x'')| \leq V_{\max}$ , where  $x' = g(s, x, \pi_f, s'), x'' = g(s, x, \pi_f, s'')$ .

587 There are two places we need to pay attention to: (1) : a bound on  $\|f_0 - Q^*\|_{2,P(\xi) \times \pi_{f_0}, Q^*}$ , (2) : a  
588 bound on the variance of  $Y$  as shown in Eq. (15). For the first case, it automatically holds due to  
589 assumption 1. For the second term, we first have

$$\begin{aligned} \text{Var}(Y(f; f')) &\leq \mathbb{E}[Y(f; f')^2] \\ &= \mathbb{E}[(f(s, x, a) - r - \gamma V_{f'}(s', x'))^2 - (\mathcal{T}f'(s, x, a) - r - \gamma V_{f'}(s', x'))^2] \\ &= \mathbb{E}[(f(s, x, a) - \mathcal{T}f'(s, x, a))^2 (f(s, x, a) + \mathcal{T}f'(s, x, a) - 2r - 2\gamma V_{f'}(s', x'))^2] \\ &= \mathbb{E}[(f(s, x, a) - \mathcal{T}f'(s, x, a))^2 (f(s, x, a) - \mathcal{T}f'(s, x, a) + 2\mathcal{T}f'(s, x, a) - 2r - 2\gamma V_{f'}(s', x'))^2]. \end{aligned}$$

590 We also know that

$$\begin{aligned} &(f(s, x, a) - \mathcal{T}f'(s, x, a) + 2\mathcal{T}f'(s, x, a) - 2r - 2\gamma V_{f'}(s', x'))^2 \\ &\leq 2(f(s, x, a) - \mathcal{T}f'(s, x, a))^2 + 2(2\mathcal{T}f'(s, x, a) - 2r - 2\gamma V_{f'}(s', x'))^2 \\ &= 2(f(s, x, a) + Q^*(s, x, a) - Q^*(s, x, a) - \mathcal{T}f'(s, x, a))^2 + 8\gamma^2(\mathbb{E}[V_{f'}(\hat{s}, \hat{x})|s, x, a] - V_{f'}(s', x'))^2 \\ &\leq 16V_{\max}^2. \end{aligned}$$

591 Therefore, we have  $\text{Var}(Y(f; f')) \leq 16V_{\max}^2 \mathbb{E}[Y(f; f')]$ .

592 Then we can obtain a similar result of the same order, which only differs for some constant  $\tilde{c}$  such  
593 that

$$v^* - v^{\pi_{f_k}} \leq \frac{2\tilde{c}}{(1 - \gamma)^2} \left( \sqrt{\frac{(m+1)C\epsilon_1}{m\sigma_1}} + \sqrt{c_0\sigma_2}V_{\max} + \gamma^k(1 - \gamma)V_{\max} \right). \quad (25)$$

## 594 B Additional Simulations

### 595 B.1 Combining PSG with Policy Gradient-type algorithms

596 In this section, we investigate the possibilities of using ASG in policy gradient-type algorithms. In  
597 particular, we use ASG in the phase of policy evaluation. An algorithm (SAC-ASG) that incorporates  
598 ASG into SAC is presented in Alg. 3. We also compare our algorithm SAC-ASG with state-of-art  
599 Dyna-type model-based approaches, i.e., MBPO (Janner et al., 2019) on the phases criss-cross  
600 network environment (Fig. 2b). The simulation results are shown in Fig.4. We can observe that

---

**Algorithm 3: SAC-ASG**


---

```

1 Input: Critic Networks:  $Q_{\theta_1}, Q_{\theta_2}$ , Target Critic Networks:  $Q_{\theta'_1}, Q_{\theta'_2}$ ;
2   Actor-Network:  $A_\phi$ , Empty sample replay buffer:  $\mathcal{D}$ , Learning rate:  $\lambda$ ;
3 for each iteration do
4   for each environment interaction do
5     Take action  $a_t \sim A_\phi(a_t|s_t, x_t)$ , observe next state  $(s_{t+1}, x_{t+1})$ , and reward  $r_t$ ;
6     Store the transition into replay buffer:  $\mathcal{D} \leftarrow \mathcal{D} \cup \{s_t, x_t, a_t, r_t, s_{t+1}, x_{t+1}\}$ ;
7   for each training step do
8     Sample mini-batch  $d$  of  $n$  transitions from replay buffer  $\mathcal{D}$ ;
9     for Each virtual training loop do
10      Obtain virtual dataset  $d' := \text{ASG}(\mathbf{d}, \mathbf{m})$ ;
11      Combine training dataset  $d \cup d' := \{s, x, a, r, s', x'\}$ ;
12       $\tilde{a} \leftarrow A_\phi(s', x')$ ,  $y \leftarrow r + \gamma(\min_{i=1,2} Q_{\theta'_i}(s', x', \tilde{a}) - \alpha \log(A_\phi(\tilde{a}|s', x')))$ ;
13       $J_Q(\theta_i) = (nm + n)^{-1} \sum (y - Q_{\theta_i}(s, x, a))^2$  for  $i \in \{1, 2\}$ ;
14       $\theta_i \leftarrow \theta_i - \lambda \nabla_{\theta_i} J_Q(\theta_i)$  for  $i \in \{1, 2\}$  // Update Critic networks
15       $J_\pi(\phi) = (nm + n)^{-1} \sum (\alpha \log A_\phi(a|s) - \min_{i=1,2} Q_{\theta_i}(s, a))$ ;
16       $\phi \leftarrow \phi - \lambda \nabla_\phi J_\pi(\phi)$  // Update Actor network
17       $\theta'_i \leftarrow \tau \theta_i + (1 - \tau) \theta'_i$  // Update target network weights
18 Output: Actor Network  $A_\phi$ ;

```

---

the performance of our approach is significantly better than the baselines'. We also would like to emphasize that the training time of our approach is much less than that of MBPO (4 hours v.s. 3 days).

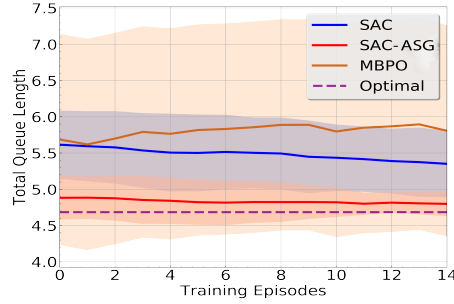

Figure 4: Performance on the Two Phases Criss-Cross Network

## B.2 Details of the Environment in Section 4.4

In this section, we summarize the detailed parameters used in section 4.4 in Table 3.

| Setting | Arrival Rates  | Service Rates       | Job Size Range |
|---------|----------------|---------------------|----------------|
| (a)     | $\{0.6, 0.6\}$ | $\{2, 1.5, 1.5\}$   | 2              |
| (a)     | $\{0.6, 0.6\}$ | $\{7, 3.5, 7\}$     | 5              |
| (c)     | $\{0.6, 0.6\}$ | $\{2.5, 4.5, 2.5\}$ | 5              |

Table 3: Detailed Environment Parameters

## B.3 Experimental settings

For all the simulations, We used a single NVIDIA GeForce RTX 2080 Super with AMD Ryzen 7 3700 8-Core Processor.
